# Supplementary material for: Vitamin D inhibits osteosarcoma by reprogramming nonsense-mediated RNA decay and SNAI2-mediated epithelial-to-mesenchymal transition
Source: Front Oncol. 2023 May 9;13:1188641. doi: 10.3389/fonc.2023.1188641 (PMC10203545; doi:10.3389/fonc.2023.1188641)
Supplement: Supplementary file 22 [file Table_6.xlsx]

## Sheet: MG63 unique
[MG63 - H3K27ac ]:
PRDM1
PU.1-IRF
ELF5
ARE
PQM-1
PU.1
GRE
GABPA
ERE
FXR
EOMES
ELT-3
GRE
T1ISRE
DREF
Pbx3
Max
LIN-39
HIF2a
E2F
E2F6
PBX1
NF1
HRE
c-Myc
HOXA2

## Sheet: MG63 and LM7 overlap
MG63 - H3K27ac ] and [LM7 - H3K27ac]:
NF1
BMYB
Initiator
MYB
AR
SCL
ZFX
PHA-4
Nr5a2
HIF1b
RXR
AP-1
AP-2alpha
ERG
PR
AP2gamma
Nrf2
ZNF711
Nr5a2
MafA
Bach1
EWF
RUNX
NFAT
Esrrb
IRF2
RUNX1
NF-E2
Stat3+il23
Atoh1
Lhx3-like
RUNX2
ISRE
ETS1
Olig2
Tlx
Bcl6
STAT4
Gata2
Jun-AP1
NF1
Ets1-distal
Fli1
IRF4
Smad3
EBF1
Tal1
Gata1
Znf263
CArG
STAT6
Stat3
GATA3
Gata4
Foxa2
RUNX-AML
Tcfcp2l1
Foxo1
Nur77
Nanog
CHR
GATA
ETV1
FOXP1
PPARE
NFAT
Pdx1
PRDM14
Six1
SPDEF
Hoxc9
Sox6
Smad2
STAT6
Foxh1
Tcf3
EWS
PCF
VDR
HNF4a
PIF5ox
PAX3
Arnt
Smad4
E-box
FHY3
CEBP
Sox3
Tbx20
MyoD
Hoxb4
HLH-1
USF1
NeuroD1
HOXA9
TEAD4
EBF
TATA-Box
OCT4
STAT5
STAT1
Myf5
n-Myc

## Sheet: LM7 unique
[LM7 - H3K27ac]:
TEAD
MafK
TCFL2
NFkB
Sox2
MyoG
TR4
Tcf12
GATA-IR4
Tcf4
HEB
E2F7
caudal
MafF
SEP3

## Sheet: Overlap - GO - Pathways
1	Beta3 adrenergic receptor signaling pathway (P04379)	1	0.013	0.012
2	Beta2 adrenergic receptor signaling pathway (P04378)	1	0.013	0.012
3	Beta1 adrenergic receptor signaling pathway (P04377)	1	0.013	0.012
4	JAK/STAT signaling pathway (P00038)	5	0.067	0.06
5	5HT4 type receptor mediated signaling pathway (P04376)	1	0.013	0.012
6	Angiogenesis (P00005)	3	0.04	0.036
7	Alzheimer disease-presenilin pathway (P00004)	1	0.013	0.012
8	Interleukin signaling pathway (P00036)	5	0.067	0.06
9	5HT2 type receptor mediated signaling pathway (P04374)	1	0.013	0.012
10	Interferon-gamma signaling pathway (P00035)	1	0.013	0.012
11	5HT1 type receptor mediated signaling pathway (P04373)	1	0.013	0.012
12	Insulin/IGF pathway-protein kinase B signaling cascade (P00033)	1	0.013	0.012
13	Inflammation mediated by chemokine and cytokine signaling pathway (P00031)	4	0.053	0.048
14	Hypoxia response via HIF activation (P00030)	1	0.013	0.012
15	Nicotine pharmacodynamics pathway (P06587)	1	0.013	0.012
16	Heterotrimeric G-protein signaling pathway-rod outer segment phototransduction (P00028)	1	0.013	0.012
17	p53 pathway feedback loops 2 (P04398)	1	0.013	0.012
18	Heterotrimeric G-protein signaling pathway-Gq alpha and Go alpha mediated pathway (P00027)	1	0.013	0.012
19	Heterotrimeric G-protein signaling pathway-Gi alpha and Gs alpha mediated pathway (P00026)	1	0.013	0.012
20	Wnt signaling pathway (P00057)	3	0.04	0.036
21	Vitamin D metabolism and pathway (P04396)	1	0.013	0.012
22	VEGF signaling pathway (P00056)	1	0.013	0.012
23	Thyrotropin-releasing hormone receptor signaling pathway (P04394)	1	0.013	0.012
24	Ras Pathway (P04393)	3	0.04	0.036
25	TGF-beta signaling pathway (P00052)	4	0.053	0.048
26	Oxytocin receptor mediated signaling pathway (P04391)	1	0.013	0.012
27	EGF receptor signaling pathway (P00018)	6	0.08	0.071
28	PI3 kinase pathway (P00048)	1	0.013	0.012
29	Opioid proopiomelanocortin pathway (P05917)	1	0.013	0.012
30	PDGF signaling pathway (P00047)	9	0.12	0.107
31	Opioid prodynorphin pathway (P05916)	1	0.013	0.012
32	Histamine H2 receptor mediated signaling pathway (P04386)	1	0.013	0.012
33	Oxidative stress response (P00046)	1	0.013	0.012
34	Opioid proenkephalin pathway (P05915)	1	0.013	0.012
35	Histamine H1 receptor mediated signaling pathway (P04385)	1	0.013	0.012
36	Cadherin signaling pathway (P00012)	1	0.013	0.012
37	Enkephalin release (P05913)	1	0.013	0.012
38	Cortocotropin releasing factor receptor signaling pathway (P04380)	1	0.013	0.012
39	CCKR signaling map (P06959)	3	0.04	0.036
40	Gonadotropin-releasing hormone receptor pathway (P06664)	10	0.133	0.119

## Sheet: Overlap - GO - BP
1	cellular process (GO:0009987)	60	0.8	0.233
2	biological phase (GO:0044848)	2	0.027	0.008
3	reproductive process (GO:0022414)	3	0.04	0.012
4	biological process involved in interspecies interaction between organisms (GO:0044419)	1	0.013	0.004
5	reproduction (GO:0000003)	3	0.04	0.012
6	biological regulation (GO:0065007)	57	0.76	0.221
7	response to stimulus (GO:0050896)	13	0.173	0.05
8	signaling (GO:0023052)	11	0.147	0.043
9	developmental process (GO:0032502)	31	0.413	0.12
10	multicellular organismal process (GO:0032501)	13	0.173	0.05
11	metabolic process (GO:0008152)	59	0.787	0.229
12	immune system process (GO:0002376)	5	0.067	0.019

## Sheet: MG63 Unique - GO - Pathways
1	Oxidative stress response (P00046)	1	0.083	0.2
2	EGF receptor signaling pathway (P00018)	1	0.083	0.2
3	Gonadotropin-releasing hormone receptor pathway (P06664)	1	0.083	0.2
4	PDGF signaling pathway (P00047)	2	0.167	0.4

## Sheet: MG63 Unique - GO - BP
1	response to stimulus (GO:0050896)	3	0.25	0.073
2	signaling (GO:0023052)	1	0.083	0.024
3	immune system process (GO:0002376)	1	0.083	0.024
4	developmental process (GO:0032502)	6	0.5	0.146
5	cellular process (GO:0009987)	9	0.75	0.22
6	multicellular organismal process (GO:0032501)	3	0.25	0.073
7	metabolic process (GO:0008152)	9	0.75	0.22
8	biological regulation (GO:0065007)	9	0.75	0.22

## Sheet: LM7 Unique - GO - Pathways 
1	CCKR signaling map (P06959)	2	0.2	1

## Sheet: LM7 Unique - GO - BP
1	developmental process (GO:0032502)	4	0.4	0.125
2	cellular process (GO:0009987)	9	0.9	0.281
3	multicellular organismal process (GO:0032501)	2	0.2	0.063
4	metabolic process (GO:0008152)	8	0.8	0.25
5	biological regulation (GO:0065007)	8	0.8	0.25
6	localization (GO:0051179)	1	0.1	0.031
